# Supplementary material for: Risk of predation makes foragers less choosy about their food
Source: PLOS journal article supplement (doi:10.1371/journal.pone.0187167), 2017-11-09
Supplement: S2 (10.1371/journal.pone.0187167.s002) [file journal.pone.0187167.s002]

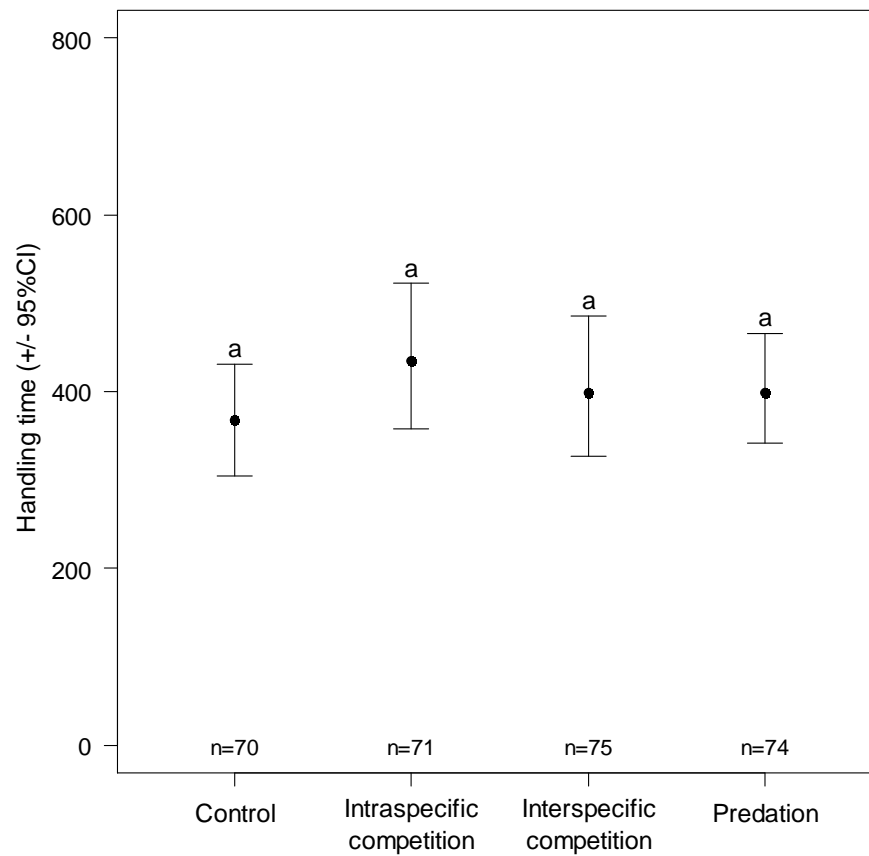

**S2 Fig.: Mean duration (bootstrapped  $\pm$  95%CI) of handling time in each treatment.** Different letters correspond to statistically significant difference between treatments (post-hoc pairwise comparison with Tukey adjustment for multiple comparisons). The sample sizes are shown above the x-axis.
